# Supplementary material for: The synthesis of 3-ethyl-5-methyl-2,6-diarylpiperidin-4-on-1-ium picrates and their spectral, XRD and theoretical studies
Source: Royal Society of Chemistry journal article supplement (doi:10.1039/c9nj01631g), 2019-01-01
Supplement: c9nj01631g1.pdf [file c9nj01631g1.pdf]

## Supporting Information

### Synthesis, Spectral, XRD and Theoretical studies on 3-ethyl-5-methyl-2,6-diarylpiperidin-4-on-1-ium picrates

S. Amala<sup>a</sup>, G. Rajarajan<sup>\*a</sup>, E. Dhineshkumar<sup>a</sup>, M. Arockia doss<sup>a,b</sup>, V. Thanikachalam<sup>a</sup>,  
S. Selvanayagam<sup>c</sup> and B. Sridhar<sup>d</sup>

<sup>a</sup>Department of Chemistry, Annamalai University, Annamalainagar 608 002, India.

<sup>b</sup>Department of Chemistry, St. Joseph University, Nagaland -797 115, India.

<sup>c</sup>PG & Research Department of Physics, Government Arts College, Melur - 625 106, India.

<sup>d</sup>Laboratory of X-ray Crystallography, Indian Institute of Chemical Technology, Hyderabad - 500 067, India.

\*Corresponding author: E-mail: [rajarajang70@gmail.com](mailto:rajarajang70@gmail.com)

### Contents

1. **Fig S1.** FT-IR spectrum of compound 1
2. **Fig S2.** FT-IR spectrum of compound 2
3. **Fig S3.** FT-IR spectrum of compound 3
4. **Fig S4.** <sup>1</sup>H NMR spectrum of compound 1
5. **Fig S5.** <sup>1</sup>H NMR spectrum of compound 2
6. **Fig S6.** <sup>1</sup>H NMR spectrum of compound 3
7. **Fig S7.** <sup>13</sup>C NMR spectrum of compound 1
8. **Fig S8.** <sup>13</sup>C NMR spectrum of compound 2
9. **Fig S9.** <sup>13</sup>C NMR spectrum of compound 3
10. **Table S1.** Crystal data and structure refinement details.
11. **Table S2.** Bond lengths (Å) and bond angles (°) for non-H atoms with esd's in parenthesis
12. **Table S3.** Contributions of interacting atoms in crystal 1.
13. **Table S4.** Optimized parameter of compounds 1-3.
14. **Table S5.** Observed and computed wavenumber of compounds 1-3.
15. **Table S6.** Second order perturbation theory analysis of Fock matrix in NBO basis.

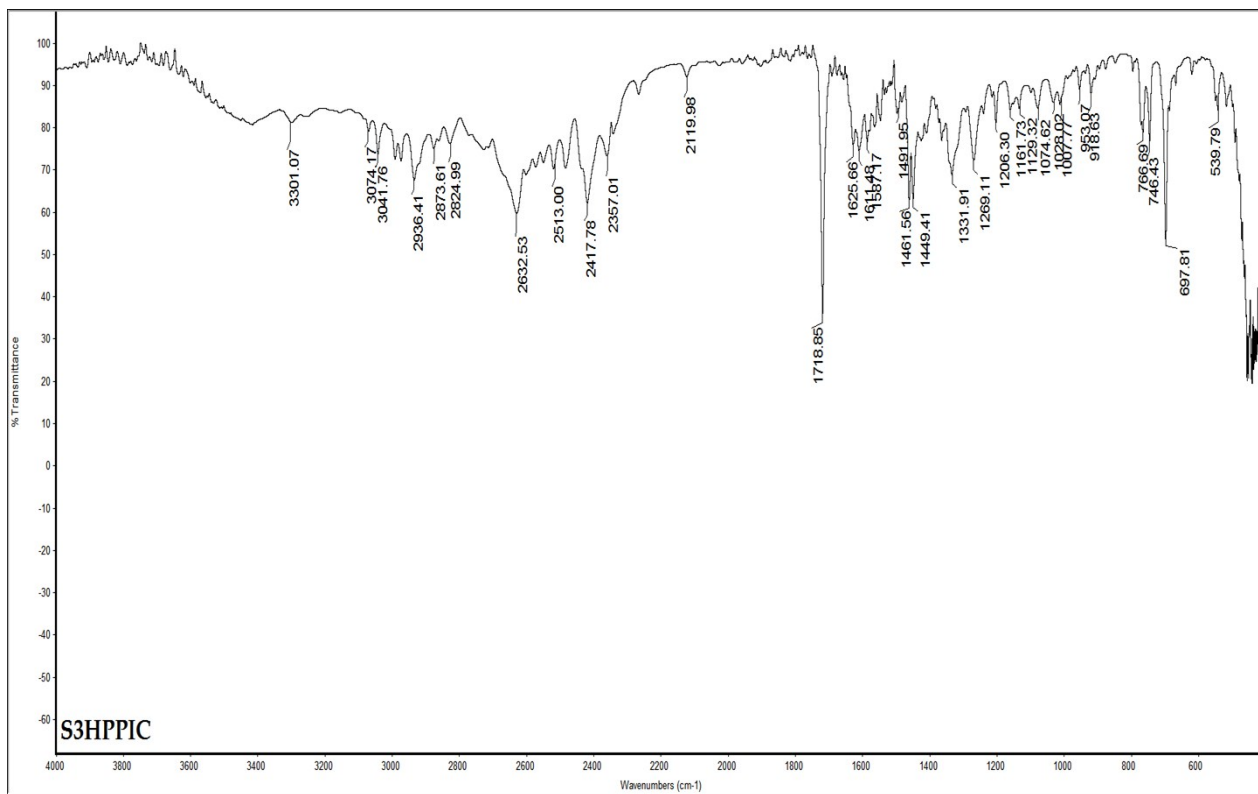

**Fig S1. FT-IR spectrum of compound 1**

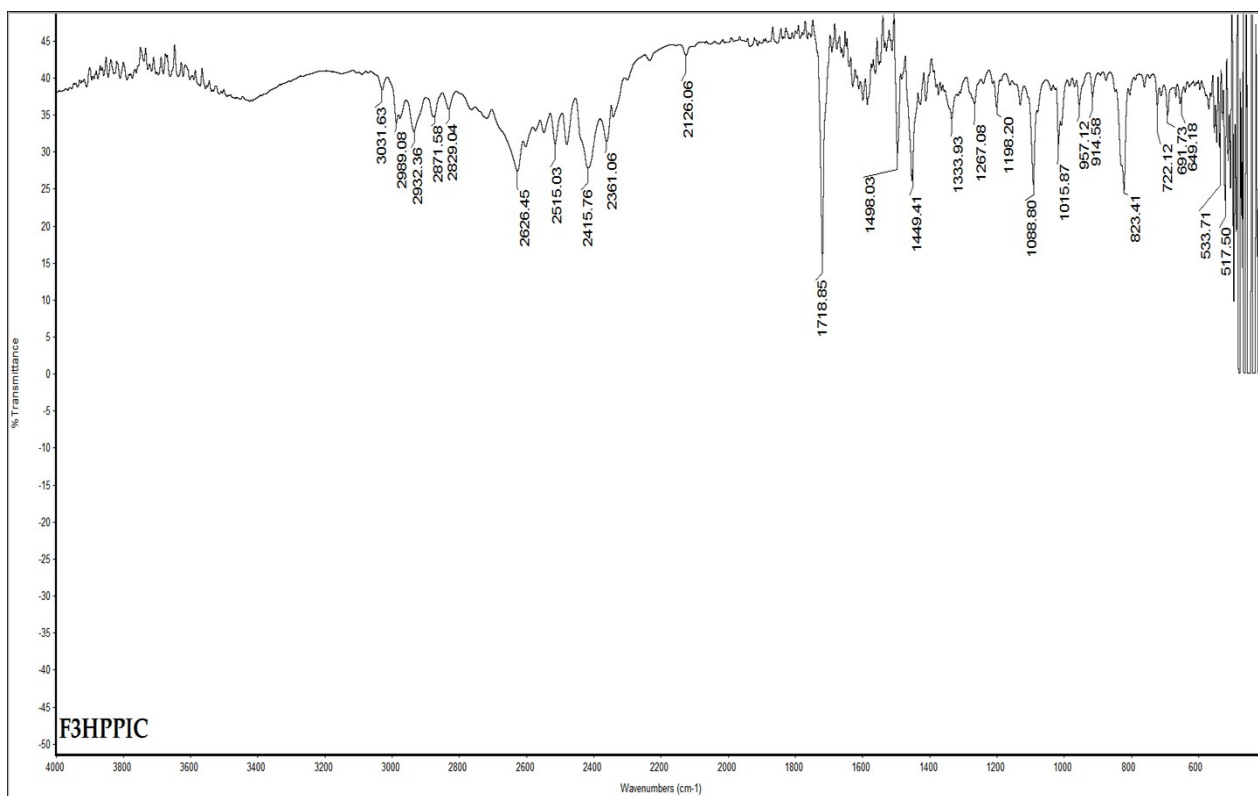

**Fig S2. FT-IR spectrum of compound 2**

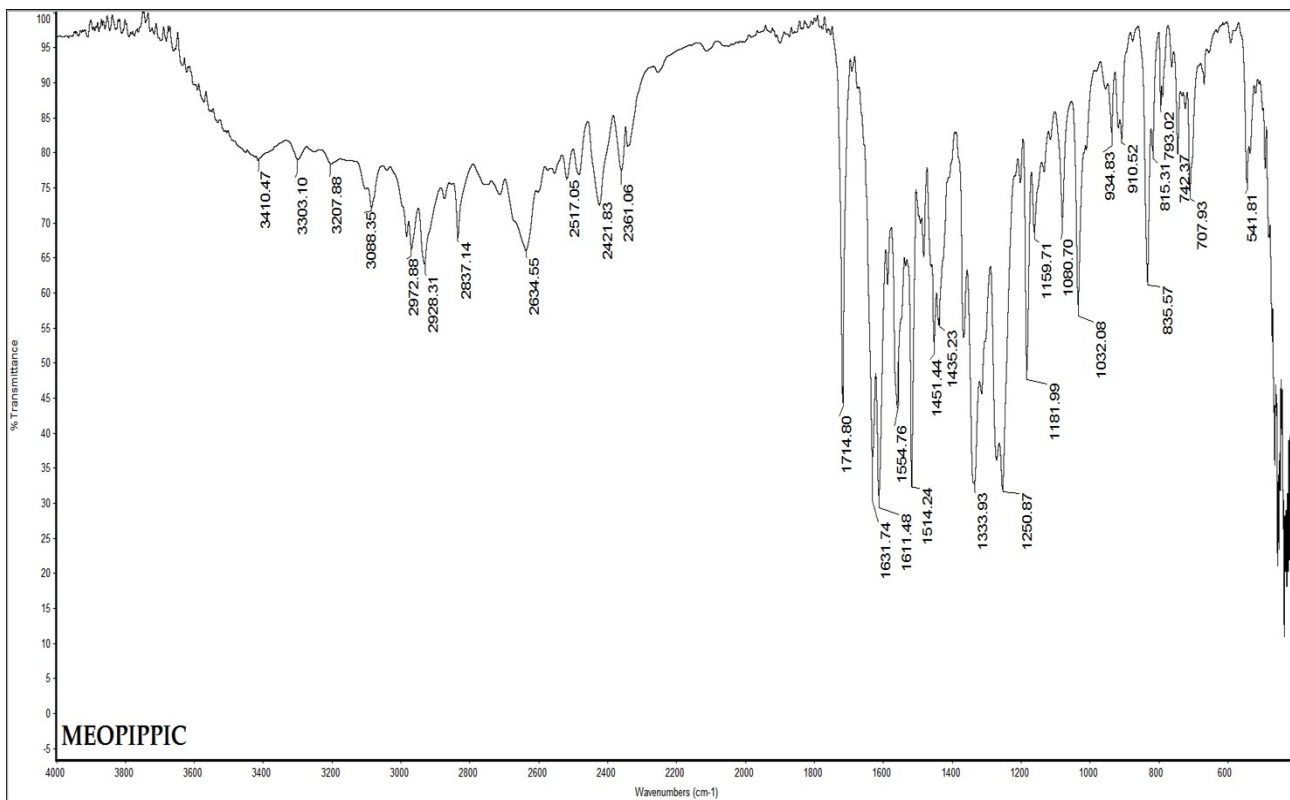

Fig S3. FT-IR spectrum of compound 3

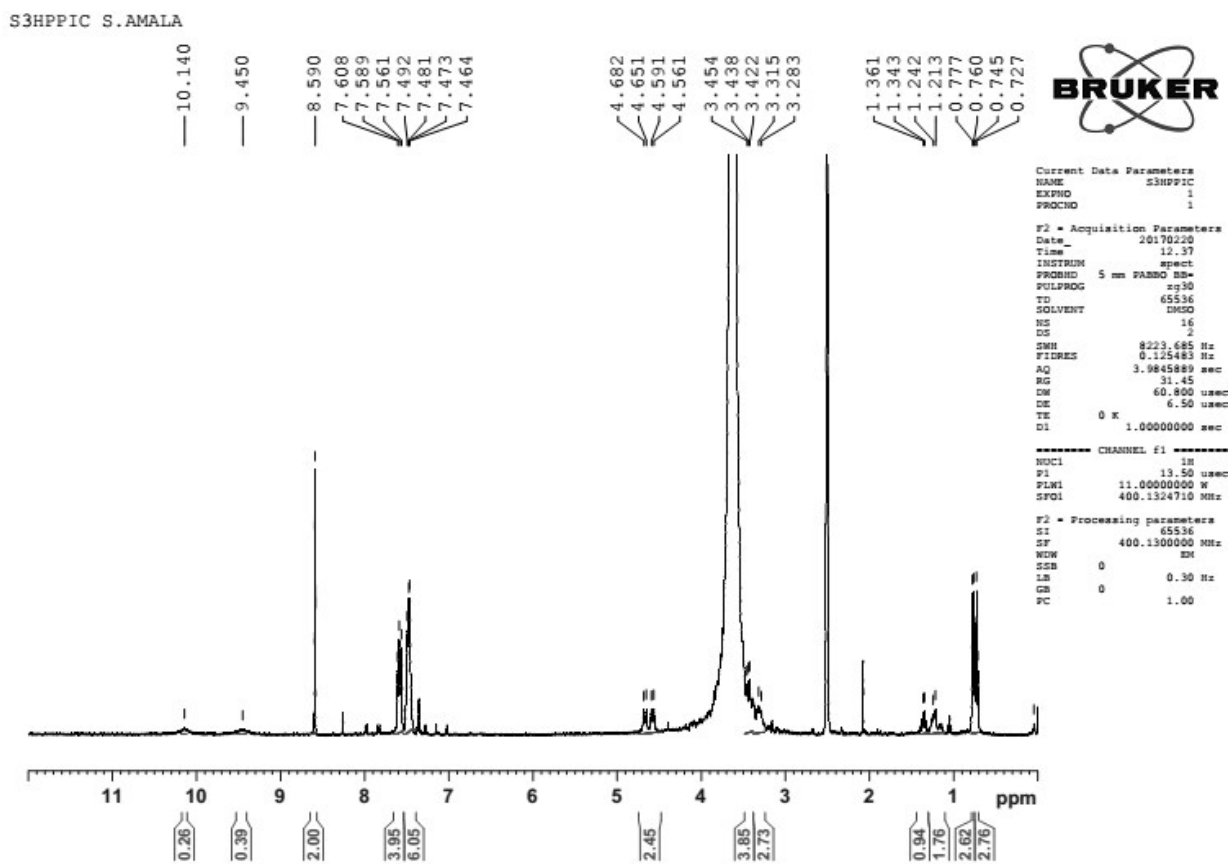

Fig S4. <sup>1</sup>H NMR spectrum of compound 1

FSHPIP S.AMALA

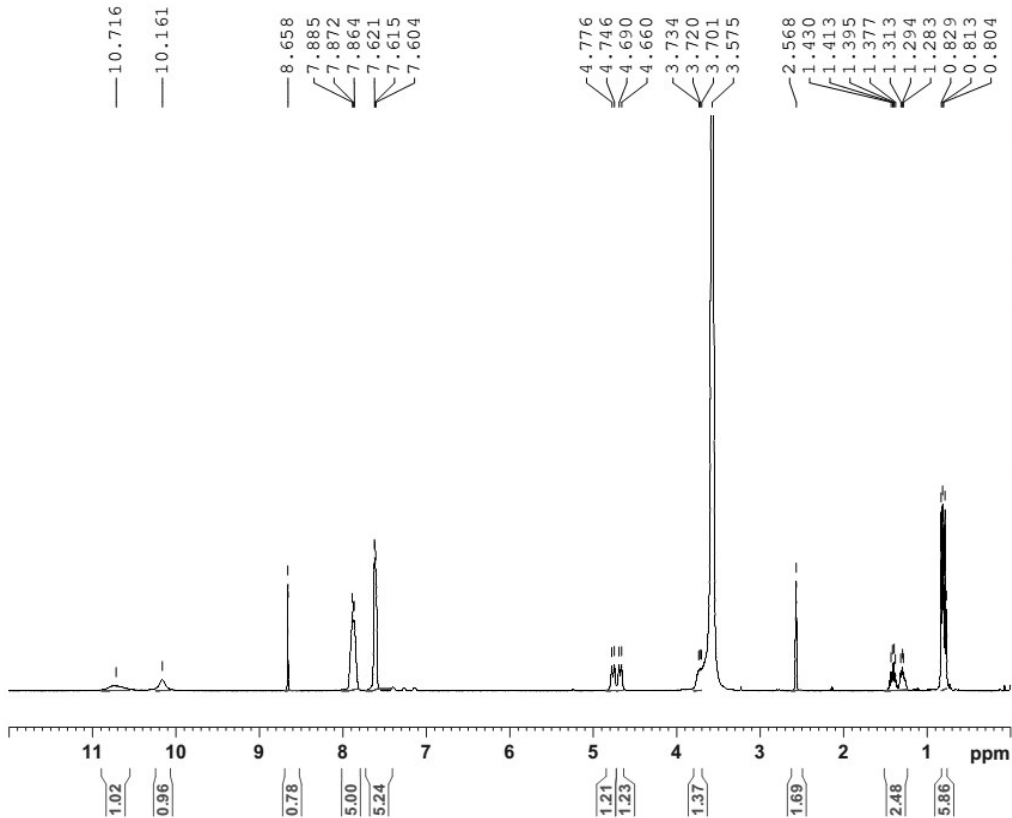

Fig S5. <sup>1</sup>H NMR spectrum of compound 2

MEO3HPIC S.AMALA

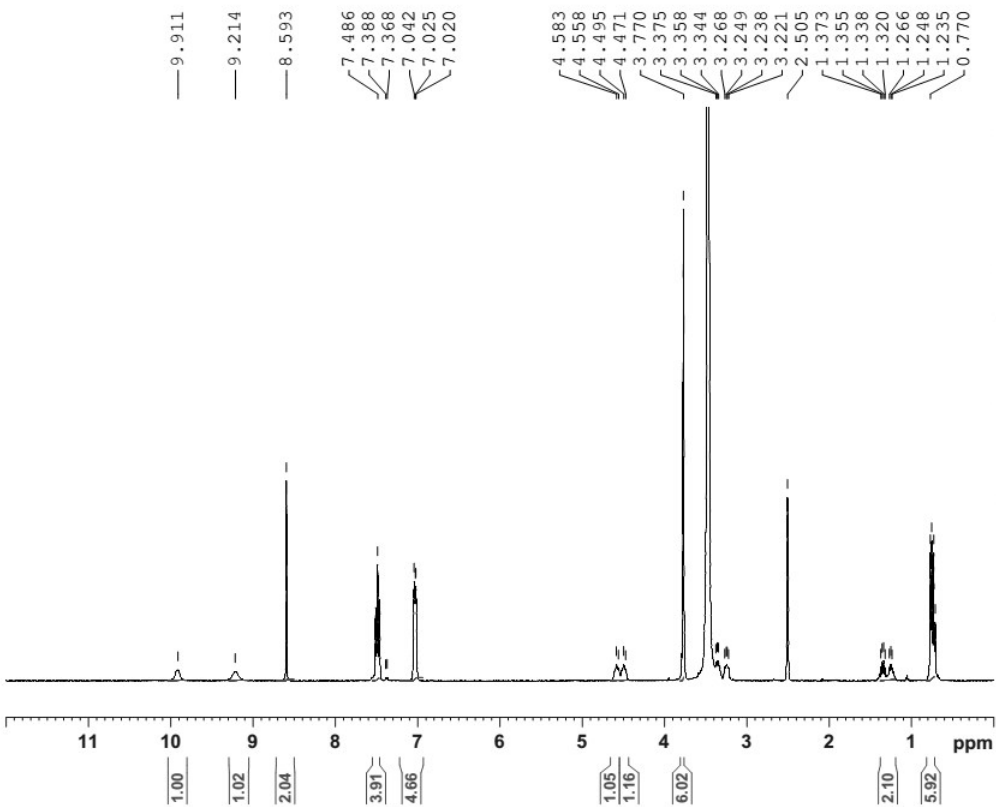

Fig S6. <sup>1</sup>H NMR spectrum of compound 3

S3HPPIC S.AMALA

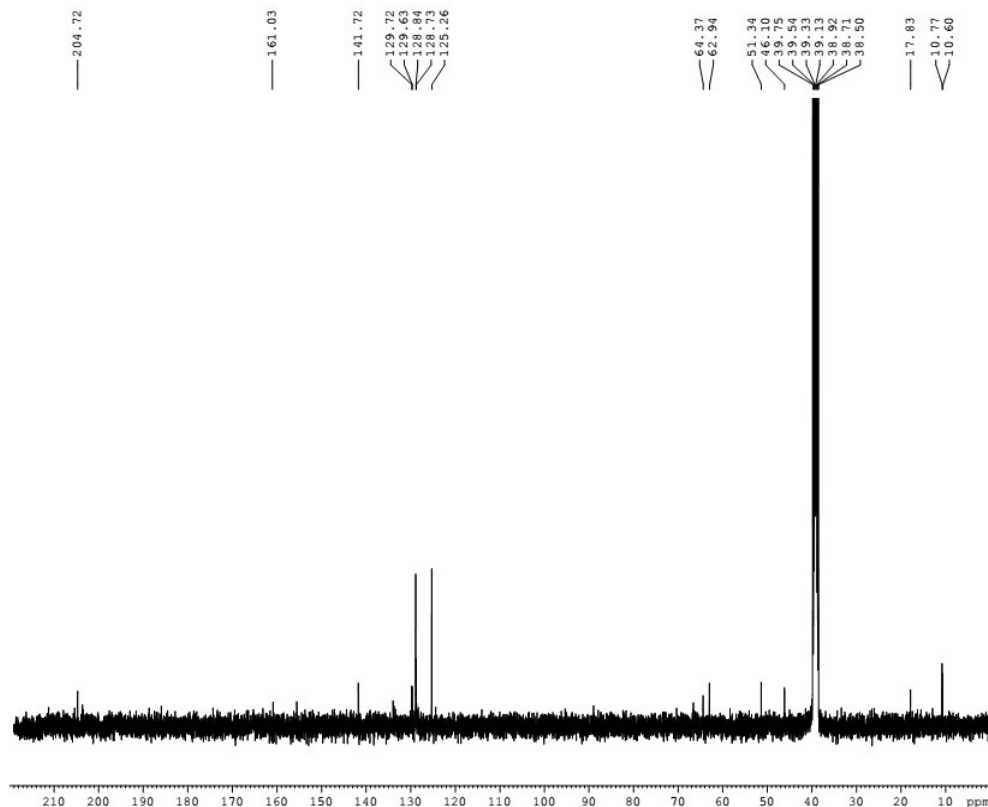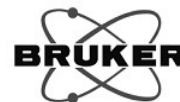

```
Current Data Parameters
NAME      S3HPPIC
EXPNO     1
PROCNO    1

F2 - Acquisition Parameters
Date_     20170306
Time      16.49
INSTRUM   spect
PROBHD    5 mm PABBO BB-
PULPROG   zgpg30
TD         65536
SOLVENT   DMSO
NS         1024
DS         4
SWH        24038.461 Hz
FIDRES     0.366798 Hz
AQ         1.3631488 sec
RG         195.62
DW         20.800 usec
DE         6.50 usec
TE         293.3 K
D1         2.0000000 sec
D11        0.0300000 sec

===== CHANNEL f1 =====
NUC1       13C
P1         8.25 usec
PLW1       55.40000153 W
SFO1       100.6228293 MHz

===== CHANNEL f2 =====
CPDPRG2    waltz16
NUC2       1H
PCPD2      90.00 usec
PLW2       11.00000000 W
PLW12      0.24750000 W
PLW13      0.20048000 W
SFO2       400.1316005 MHz

F2 - Processing parameters
SI         32768
SF         100.6128193 MHz
WDW        EM
SSB        0
LB         1.00 Hz
GB         0
PC         1.40
```

Fig S7. <sup>13</sup>C NMR spectrum of compound 1

F3HPIP S.AMALA

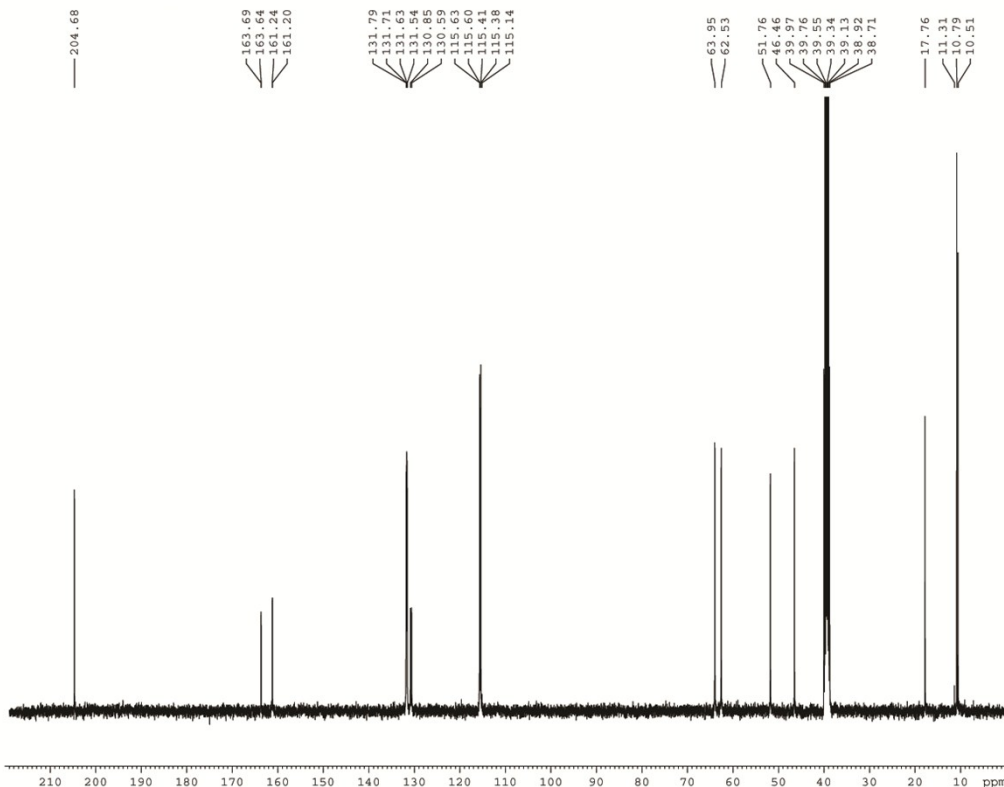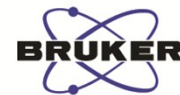

```
Current Data Parameters
NAME      F3HPIP
EXPNO     1
PROCNO    1

F2 - Acquisition Parameters
Date_     20190528
Time      17.28
INSTRUM   spect
PROBHD    5 mm PABBO BB-
PULPROG   zgpg30
TD         65536
SOLVENT   DMSO
NS         1024
DS         4
SWH        24038.461 Hz
FIDRES     0.366798 Hz
AQ         1.3631988 sec
RG         195.62
DW         20.800 usec
DE         6.50 usec
TE         295.7 K
D1         2.0000000 sec
D11        0.0300000 sec

===== CHANNEL f1 =====
NUC1       13C
P1         8.25 usec
PLW1       55.40000153 W
SFO1       100.6228293 MHz

===== CHANNEL f2 =====
CPDPRG2    waltz16
NUC2       1H
PCPD2      90.00 usec
PLW2       11.00000000 W
PLW12      0.24750000 W
PLW13      0.20048000 W
SFO2       400.1316005 MHz

F2 - Processing parameters
SI         32768
SF         100.6128193 MHz
WDW        EM
SSB        0
LB         1.00 Hz
GB         0
PC         1.40
```

Fig S8. <sup>13</sup>C NMR spectrum of compound 2

MEO3HPIC S AMALA

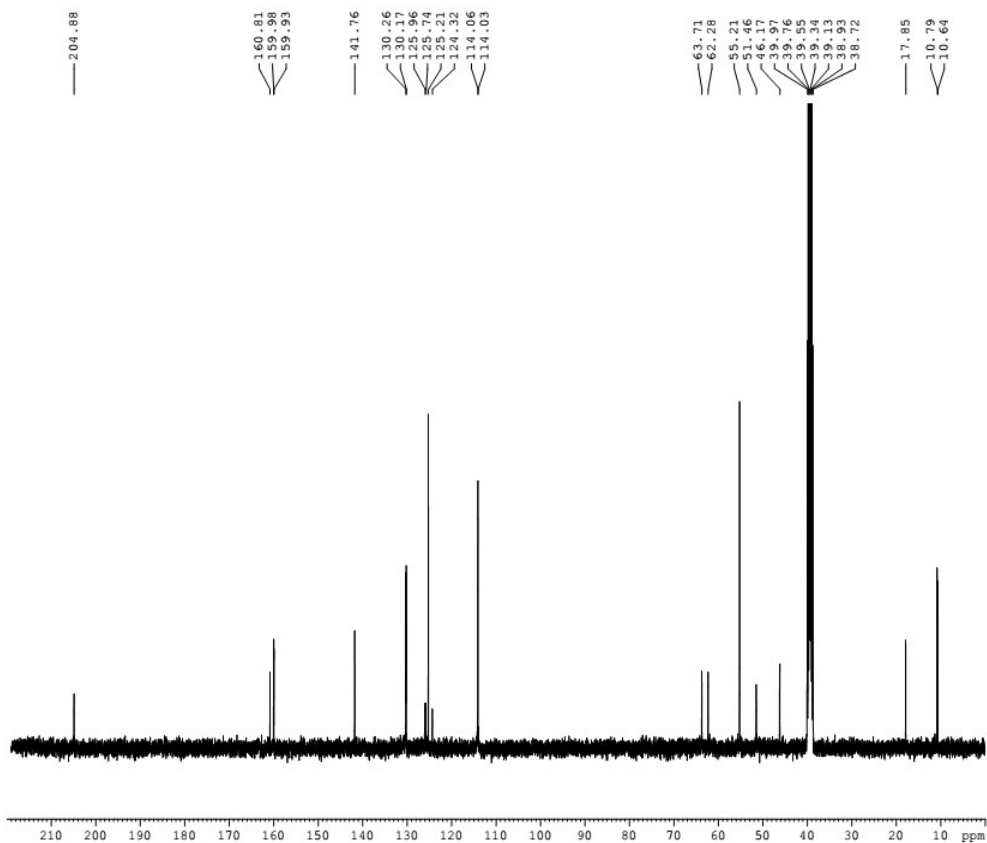

Fig S9.  $^{13}\text{C}$  NMR spectrum of compound 3

**Table S1.** Crystal data and structure refinement details.

|                                   |                                                                                |
|-----------------------------------|--------------------------------------------------------------------------------|
| CCDC Number                       | CCDC 1529858                                                                   |
| Empirical formula                 | C <sub>28</sub> H <sub>30</sub> N <sub>4</sub> O <sub>10</sub>                 |
| Formula weight                    | 582.56                                                                         |
| Temperature                       | 292(2) K                                                                       |
| Wavelength                        | 0.71073 Å                                                                      |
| Crystal system                    | Monoclinic                                                                     |
| Space group                       | C2/c                                                                           |
| Unit cell dimensions              | a = 22.0277(12) Å<br>b = 13.4965(7) Å; β = 118.2720(10)°.<br>c = 21.8512(12) Å |
| Volume                            | 5721.3(5) Å <sup>3</sup>                                                       |
| Z                                 | 8                                                                              |
| Density (calculated)              | 1.353 Mg/m <sup>3</sup>                                                        |
| Absorption coefficient            | 0.104 mm <sup>-1</sup>                                                         |
| F(000)                            | 2448                                                                           |
| Theta range for data collection   | 2.100 to 24.999°.                                                              |
| Index ranges                      | -26<=h<=26, -16<=k<=16, -25<=l<=25                                             |
| Reflections collected             | 33089                                                                          |
| Independent reflections           | 5044 [R(int) = 0.0212]                                                         |
| Completeness to theta = 24.999°   | 100.0 %                                                                        |
| Refinement method                 | Full-matrix least-squares on F <sup>2</sup>                                    |
| Data / restraints / parameters    | 5044 / 2 / 387                                                                 |
| Goodness-of-fit on F <sup>2</sup> | 1.043                                                                          |
| Final R indices [I>2sigma(I)]     | R1 = 6.6%, wR2 = 19.5%                                                         |
| R indices (all data)              | R1 = 7.4%, wR2 = 20.6%                                                         |
| Largest diff. peak and hole       | 1.099 and -0.380 e.Å <sup>-3</sup>                                             |

**Table S2.** Bond lengths (Å) and bond angles (°) for non-H atoms with esd's in parenthesis.

| Atom        | Bond length | Atoms             | Bond angle |
|-------------|-------------|-------------------|------------|
| O(1)-C(3)   | 1.217(3)    | C(9)-O(9)-C(27)   | 118.3(3)   |
| O(2)-C(21)  | 1.246(3)    | C(18)-O(10)-C(28) | 119.1(3)   |
| O(3)-N(2)   | 1.212(3)    | C(5)-N(1)-C(1)    | 112.3(2)   |
| O(4)-N(2)   | 1.206(3)    | O(4)-N(2)-O(3)    | 122.5(2)   |
| O(5)-N(3)   | 1.220(3)    | O(4)-N(2)-C(22)   | 117.8(2)   |
| O(6)-N(3)   | 1.223(3)    | O(3)-N(2)-C(22)   | 119.7(2)   |
| O(7)-N(4)   | 1.224(4)    | O(5)-N(3)-O(6)    | 122.6(2)   |
| O(8)-N(4)   | 1.222(3)    | O(5)-N(3)-C(24)   | 119.6(2)   |
| O(9)-C(9)   | 1.356(4)    | O(6)-N(3)-C(24)   | 117.8(2)   |
| O(9)-C(27)  | 1.413(6)    | C(6)-C(1)-N(1)    | 111.2(2)   |
| O(10)-C(18) | 1.367(3)    | C(6)-C(1)-C(2)    | 114.3(2)   |
| O(10)-C(28) | 1.390(5)    | N(1)-C(1)-C(2)    | 108.1(2)   |
| N(1)-C(5)   | 1.508(3)    | O(1)-C(3)-C(4)    | 123.0(2)   |
| N(1)-C(1)   | 1.514(3)    | O(1)-C(3)-C(2)    | 121.8(2)   |
| N(2)-C(22)  | 1.454(3)    | C(4)-C(3)-C(2)    | 115.2(2)   |
| N(3)-C(24)  | 1.439(3)    | C(3)-C(4)-C(13)   | 112.9(2)   |
| N(4)-C(26)  | 1.451(3)    | C(3)-C(4)-C(5)    | 107.9(2)   |
| C(1)-C(6)   | 1.502(3)    | C(13)-C(4)-C(5)   | 111.9(2)   |
| C(1)-C(2)   | 1.545(3)    | C(15)-C(5)-N(1)   | 110.8(2)   |
| C(2)-C(12)  | 1.511(4)    | C(15)-C(5)-C(4)   | 114.3(2)   |
| C(2)-C(3)   | 1.514(3)    | N(1)-C(5)-C(4)    | 108.5(2)   |
| C(3)-C(4)   | 1.512(4)    | C(7)-C(6)-C(11)   | 118.2(2)   |
| C(4)-C(13)  | 1.522(4)    | C(7)-C(6)-C(1)    | 121.8(2)   |
| C(4)-C(5)   | 1.550(3)    | C(11)-C(6)-C(1)   | 120.0(2)   |
| C(5)-C(15)  | 1.507(3)    | C(6)-C(7)-C(8)    | 121.4(3)   |
| C(6)-C(7)   | 1.378(4)    | C(10)-C(9)-C(8)   | 119.6(3)   |
| C(6)-C(11)  | 1.387(4)    | C(11)-C(10)-C(9)  | 120.2(3)   |
| C(7)-C(8)   | 1.391(4)    | C(16)-C(17)-C(18) | 120.5(3)   |
| C(8)-C(9)   | 1.384(5)    | C(19)-C(18)-C(17) | 119.5(3)   |
| C(9)-C(10)  | 1.384(5)    | C(19)-C(18)-O(10) | 124.0(3)   |
| C(10)-C(11) | 1.371(4)    | C(17)-C(18)-O(10) | 116.4(3)   |
| C(13)-C(14) | 1.479(6)    | C(18)-C(19)-C(20) | 119.9(3)   |
| C(15)-C(20) | 1.371(4)    | C(15)-C(20)-C(19) | 121.0(3)   |
| C(15)-C(16) | 1.387(4)    | O(2)-C(21)-C(22)  | 124.8(2)   |
| C(16)-C(17) | 1.365(4)    | O(2)-C(21)-C(26)  | 123.6(2)   |
| C(17)-C(18) | 1.368(5)    | C(22)-C(21)-C(26) | 111.5(2)   |
| C(18)-C(19) | 1.366(5)    | C(23)-C(22)-C(21) | 124.4(2)   |
| C(19)-C(20) | 1.392(4)    | C(23)-C(22)-N(2)  | 116.7(2)   |
| C(21)-C(22) | 1.441(3)    | C(21)-C(22)-N(2)  | 118.8(2)   |
| C(21)-C(26) | 1.442(3)    | C(22)-C(23)-C(24) | 118.9(2)   |
| C(22)-C(23) | 1.367(3)    | C(25)-C(24)-C(23) | 121.3(2)   |
| C(23)-C(24) | 1.382(3)    | C(25)-C(24)-N(3)  | 119.4(2)   |
| C(24)-C(25) | 1.372(3)    | C(23)-C(24)-N(3)  | 119.3(2)   |
| C(25)-C(26) | 1.369(3)    | C(26)-C(25)-C(24) | 119.0(2)   |
|             |             | C(25)-C(26)-C(21) | 124.5(2)   |



**Table S3.** Contributions of interacting atoms in crystal 1.

| Interacting atoms | Contribution (%) |
|-------------------|------------------|
| O...O             | 3.1              |
| C...H             | 8.2              |
| H...O             | 18.1             |
| H...H             | 36.1             |
| N...O             | 1                |
| O...C             | 1.9              |
| N...C             | 2.4              |

**Table S4.** Optimized parameter of compounds 1-3.

| Bond length     | <b>1</b> | <b>2</b> | <b>3</b> | XRD      |
|-----------------|----------|----------|----------|----------|
| C4-C3           | 1.531    | 1.531    | 1.530    | 1.512(4) |
| C3-O1           | 1.217    | 1.217    | 1.217    | 1.217(3) |
| C4-C5           | 1.549    | 1.549    | 1.549    | 1.550(3) |
| C5-N1           | 1.527    | 1.527    | 1.529    | 1.508(3) |
| C18-R18         | 1.013    | 1.345    | 1.360    | 1.367(3) |
| C9-R9           | 1.023    | 1.345    | 1.402    | 1.390(5) |
| C21-O2          | 1.262    | 1.263    | 1.261    | 1.246(3) |
| N4-O7           | 1.245    | 1.245    | 1.244    | 1.224(4) |
| N2-O4           | 1.233    | 1.233    | 1.233    | 1.206(3) |
| C21-C26         | 1.454    | 1.453    | 1.454    | 1.441(3) |
| C21-C22         | 1.377    | 1.377    | 1.377    | 1.367(3) |
| C25-C24         | 1.377    | 1.387    | 1.387    | 1.372(3) |
| N3-O6           | 1.233    | 1.233    | 1.233    | 1.223(3) |
| N3-O5           | 1.233    | 1.233    | 1.233    | 1.220(3) |
| Bond angle      |          |          | DFT      |          |
| C3-C4-C5        | 111.4    | 111.3    | 111.2    | 107.9(2) |
| C4-C5-N1        | 108.1    | 108.1    | 107.9    | 110.8(2) |
| O3-C3-C4        | 122.9    | 122.9    | 122.9    | 121.8(2) |
| C2-C1-N1        | 110.5    | 110.5    | 110.4    | 108.1(2) |
| C10-C9-C8       | 119.7    | 122.0    | 119.5    | 116.2(3) |
| C19-C18-C17     | 120.3    | 122.0    | 119.5    | 119.5(3) |
| C16-C15-C20     | 118.9    | 118.7    | 118.1    | 122.9(2) |
| C26-C21-O2      | 125.6    | 125.6    | 125.6    | 123.6(2) |
| O7-N4-O8        | 122.6    | 122.6    | 122.6    | 124.0(3) |
| O3-N2-O4        | 124.2    | 124.2    | 124.2    | 122.5(2) |
| C26-N4-O8       | 118.8    | 118.8    | 118.7    | 118.2(3) |
| C24-C25-C26     | 119.8    | 119.8    | 119.8    | 119.0(2) |
| O5-N3-O6        | 124.7    | 124.7    | 124.6    | 122.6(2) |
| C21-C22-C23     | 123.1    | 123.6    | 123.9    | 124.5(2) |
| C21-C26-C25     | 124.1    | 124.5    | 125.1    | 124.2(2) |
| C22-C21-C26     | 112.6    | 112.8    | 113.1    | 111.5(2) |
| Dihedral angle  |          |          |          |          |
| C3-C4-C5-N1     | -52.4    | -52.5    | -53.0    | -50.21   |
| O3-C3-C4-C5     | -129.2   | -128.4   | -128.2   | -        |
| N1-C6-C5-C4     | 50.8     | 50.5     | 50.5     | 170.43   |
| C15-C20-C19-C18 | -        | 0.1      |          | -        |

R=H, F and O for **1,2** and **3**, respectively

**Table S5.** Observed and computed wavenumber of compounds **1-3**.

| Assignments            | <b>1</b> |        |              | <b>2</b> |        |              | <b>3</b> |        |              |
|------------------------|----------|--------|--------------|----------|--------|--------------|----------|--------|--------------|
|                        | FT-IR    | DFT    |              | FT-IR    | DFT    |              | FT-IR    | DFT    |              |
|                        |          | Scaled | IR Intensity |          | Scaled | IR Intensity |          | Scaled | IR Intensity |
| $\nu_{\text{N-H}}$     | 3301     | 3346   | 25.57        | 3339     | 3350   | 24.88        | 3303     | 3347   | 23.48        |
| $\nu_{\text{ar-C-H}}$  | 3042     | 3088   | 21.29        | 3031     | 3081   | 32.45        | 3088     | 3088   | 120.91       |
| $\nu_{\text{ali-C-H}}$ | 2936     | 2998   | 36.40        | 2932     | 2298   | 35.75        | 2928     | 2963   | 36.37        |
| $\nu_{\text{C=O}}$     | 1719     | 1732   | 149.98       | 1719     | 1728   | 149.55       | 1714     | 1730   | 151.07       |
| $\nu_{\text{C=C}}$     | 1625     | 1620   | 329.20       | 1629     | 1635   | 239.11       | 1631     | 1619   | 398.12       |
| $\nu_{\text{asyNO}_2}$ | 1587     | 1584   | 305.69       | 1579     | 1580   | 11.46        | 1555     | 1562   | 15.99        |
|                        | 1492     | 1595   | 18.01        | 1498     | 1499   | 52.83        | 1514     | 1540   | 263.16       |
|                        | 1462     | 1475   | 30.84        |          |        |              | 1451     | 14.62  | 16.08        |
| $\nu_{\text{syNO}_2}$  | 1449     | 1445   | 301.46       | 1449     | 1450   | 302.86       | 1435     | 1441   | 340.71       |
|                        | 1332     | 1336   | 396.24       | 1344     | 1351   | 327.23       | 1334     | 1335   | 206.75       |
| $\beta_{\text{C-H}}$   | 1269     | 1268   | 176.31       | 1267     | 1292   | 114.55       | 1251     | 1254   | 10.86        |
|                        | 1206     | 1234   | 13.84        | 1198     | 1182   | 12.22        | 1181     | 1192   | 15.42        |
|                        | 1162     | 1177   | 21.0         |          |        |              | 1159     | 1160   | 46.29        |
| $\nu_{\text{C-O}}$     | 1074     | 1084   | 11.12        | 1088     | 1089   | 32.44        | 1032     | 1030   | 70.05        |
| $\Gamma_{\text{C-H}}$  | 953      | 958    | 16.72        | 957      | 958    | 18.58        | 935      | 998    | 16.55        |
|                        | 918      | 920    | 10.66        | 823      | 859    | 37.69        | 910      | 941    | 15.32        |
|                        | 766      | 767    | 21.73        | 722      | 733    | 20.21        | 707      | 720    | 24.37        |

$\nu$ - Stretching,  $\beta$ - in-plane bending,  $\Gamma$ -out-of-plane bending

**Table S6.** Second order perturbation theory analysis of Fock matrix in NBO basis.

| Type                     | Donor(i) | Occupancy | Acceptor(j) | Occupancy | E <sup>(2)</sup> (kJ/mol) |       |       |
|--------------------------|----------|-----------|-------------|-----------|---------------------------|-------|-------|
|                          |          |           |             |           | 1                         | 2     | 3     |
| $\sigma\text{-}\sigma^*$ | C4-C3    | 1.964     | C4-C5       | 0.0254    | 2.93                      | 2.89  | 2.93  |
| $\sigma\text{-}\sigma^*$ |          |           | C4-C13      | 0.019     | 3.77                      | 3.77  | 3.77  |
| $\sigma\text{-}\sigma^*$ | C3-C2    | 1.964     | C4-C13      | 0.019     | 7.66                      | 7.66  | 7.70  |
| $\sigma\text{-}\pi^*$    | C4-C5    | 1.963     | C3-O1       | 0.080     | 10.71                     | 10.96 | 11.09 |
| $\sigma\text{-}\sigma^*$ |          |           | C3-O1       | 0.013     | 6.07                      | 5.98  | 6.02  |
| $\sigma\text{-}\pi^*$    | C5-N1    | 1.985     | C15-C20     | 0.373     | 6.65                      | 6.02  | 6.40  |
| $\sigma\text{-}\sigma^*$ | C5-C15   | 1.976     | C15-C20     | 0.024     | 9.67                      | 10.04 | 10.63 |
| $\sigma\text{-}\sigma^*$ |          |           | C19-C20     | 0.014     | 8.24                      | 8.37  | 8.49  |
| $\pi\text{-}\pi^*$       | C15-C20  | 1.692     | C16-C17     | 0.298     | 81.80                     | 89.66 | 87.45 |
| $\pi\text{-}\pi^*$       |          |           | C18-C19     | 0.384     | 79.12                     | 74.81 | 67.32 |
| $\pi\text{-}\pi^*$       | C16-C17  | 1.703     | C15-C20     | 0.079     | 86.32                     | 76.78 | 72.30 |
| $\pi\text{-}\pi^*$       |          |           | C18-C19     | 0.384     | 84.10                     | 97.11 | 90.67 |
| $\pi\text{-}\pi^*$       | C18-C19  | 1.647     | C15-C20     | 0.079     | 90.75                     | 93.43 | 98.83 |
| $\pi\text{-}\pi^*$       |          |           | C16-C17     | 0.297     | 83.26                     | 76.40 | 67.20 |
| $\pi\text{-}\pi^*$       | C7-C8    | 1.698     | C6-C11      | 0.376     | 74.42                     | 78.16 | 73.72 |
| $\pi\text{-}\pi^*$       |          |           | C9-C10      | 0.295     | 90.50                     | 98.91 | 92.38 |
| $\pi\text{-}\pi^*$       | C9-C10   | 1.698     | C6-C11      | 0.376     | 97.40                     | 94.22 | 99.45 |
| $\pi\text{-}\pi^*$       |          |           | C7-C8       | 0.387     | 59.33                     | 75.81 | 66.65 |
| $\pi\text{-}\sigma^*$    | LP(1)O1  | 1.979     | C4-C3       | 0.073     | 92.74                     | 91.00 | 90.63 |
| $\pi\text{-}\sigma^*$    |          |           | C2-C3       | 0.065     | 88.20                     | 86.61 | 86.15 |
| n- $\sigma^*$            | LP(2)O2  | 1.872     | C21-C22     | 0.056     | 40.72                     | 46.99 | 42.51 |
| n- $\sigma^*$            |          |           | C21-C26     | 0.058     | 61.84                     | 67.53 | 63.47 |
| n- $\sigma^*$            | LP(2)O7  | 1.912     | C26-N4      | 0.088     | 44.31                     | 46.69 | 50.50 |
| n- $\sigma^*$            |          |           | N4-O8       | 0.055     | 73.22                     | 76.27 | 80.37 |
| n- $\sigma^*$            | LP(2)O8  | 1.895     | C26-N4      | 0.088     | 50.79                     | 56.07 | 51.88 |
| n- $\sigma^*$            |          |           | N4-O7       | 0.055     | 84.10                     | 82.80 | 79.45 |
| n- $\sigma^*$            | LP(2)O6  | 1.897     | C24-N3      | 0.100     | 51.97                     | 44.43 | 51.34 |
| n- $\sigma^*$            |          |           | N3-O5       | 0.057     | 80.17                     | 77.86 | 82.09 |
| n- $\sigma^*$            | LP(2)O4  | 1.899     | C22-N2      | 0.061     | 52.01                     | 73.85 | 44.39 |
| n- $\sigma^*$            |          |           | N2-O3       | 0.057     | 80.00                     | 77.19 | 73.64 |
| n- $\sigma^*$            | LP(2)O3  | 1.897     | C22-N2      | 0.067     | 47.91                     | 56.15 | 50.75 |
|                          |          |           | N2-O4       | 0.057     | 82.76                     | 80.00 | 83.76 |
